# Supplementary material for: A novel risk score model based on pyroptosis-related genes for predicting survival and immunogenic landscape in hepatocellular carcinoma
Source: publisher site journal article supplement (doi:10.18632/aging.204544), 2023-02-24
Supplement: Supplementary file [file aging-v15i5-204544-supplementary-material-SD1.pdf]

SUPPLEMENTARY FIGURES

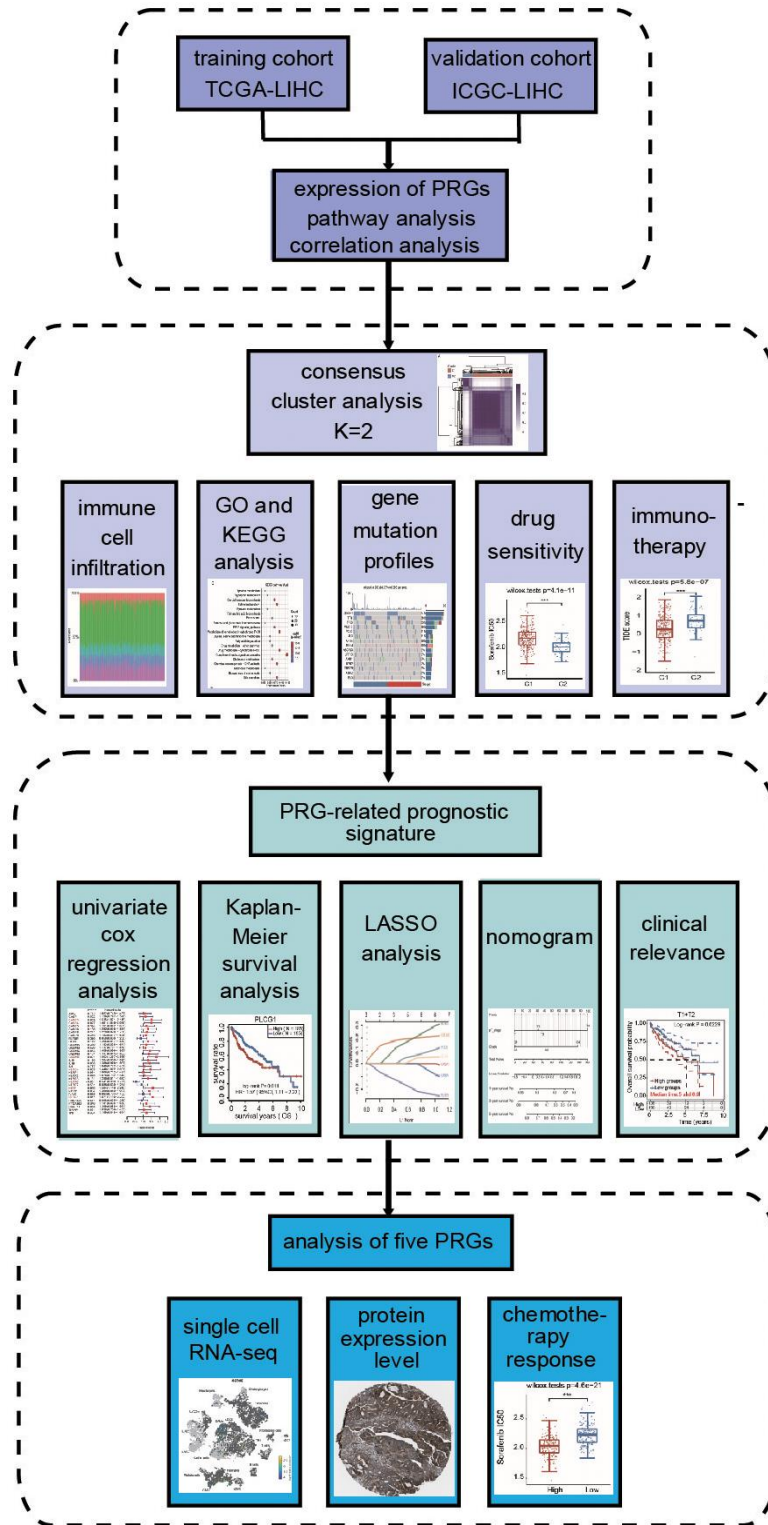

Supplementary Figure 1. The analytical workflow to construct the pyroptosis-related risk model in HCC.

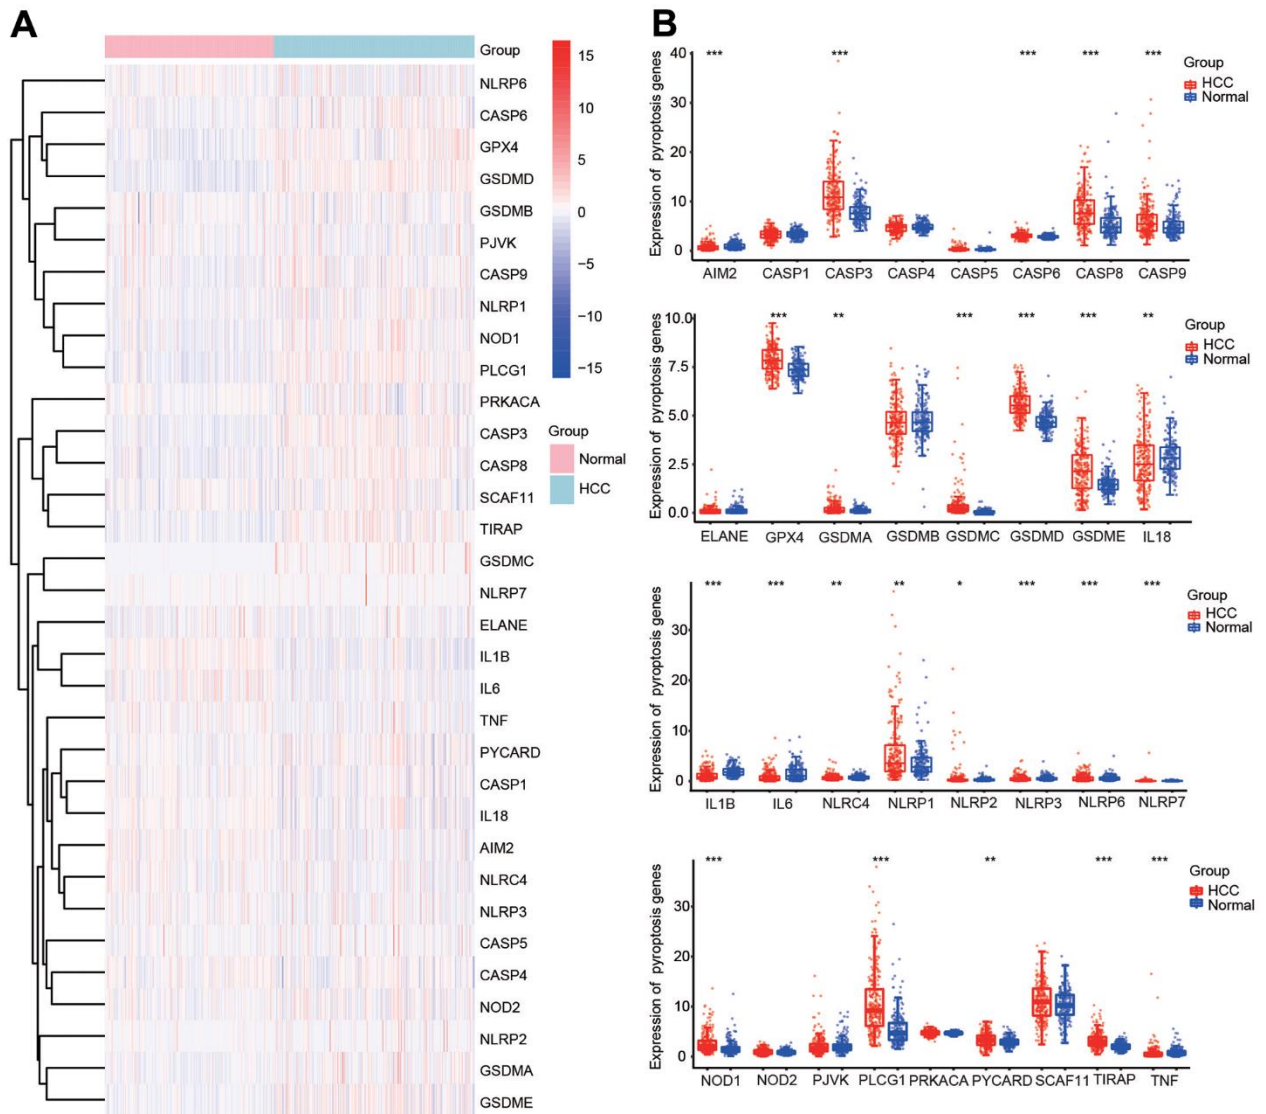

**Supplementary Figure 2. Differential expression of 33 PRGs in HCC according to the ICGC database. (A)** Heatmap of the differential expression of PRGs in HCC samples and normal samples. **(B)** Box diagram of the differential expression of PRGs in HCC samples and normal samples. \* $p < 0.05$ , \*\* $p < 0.01$ , \*\*\* $p < 0.001$ .

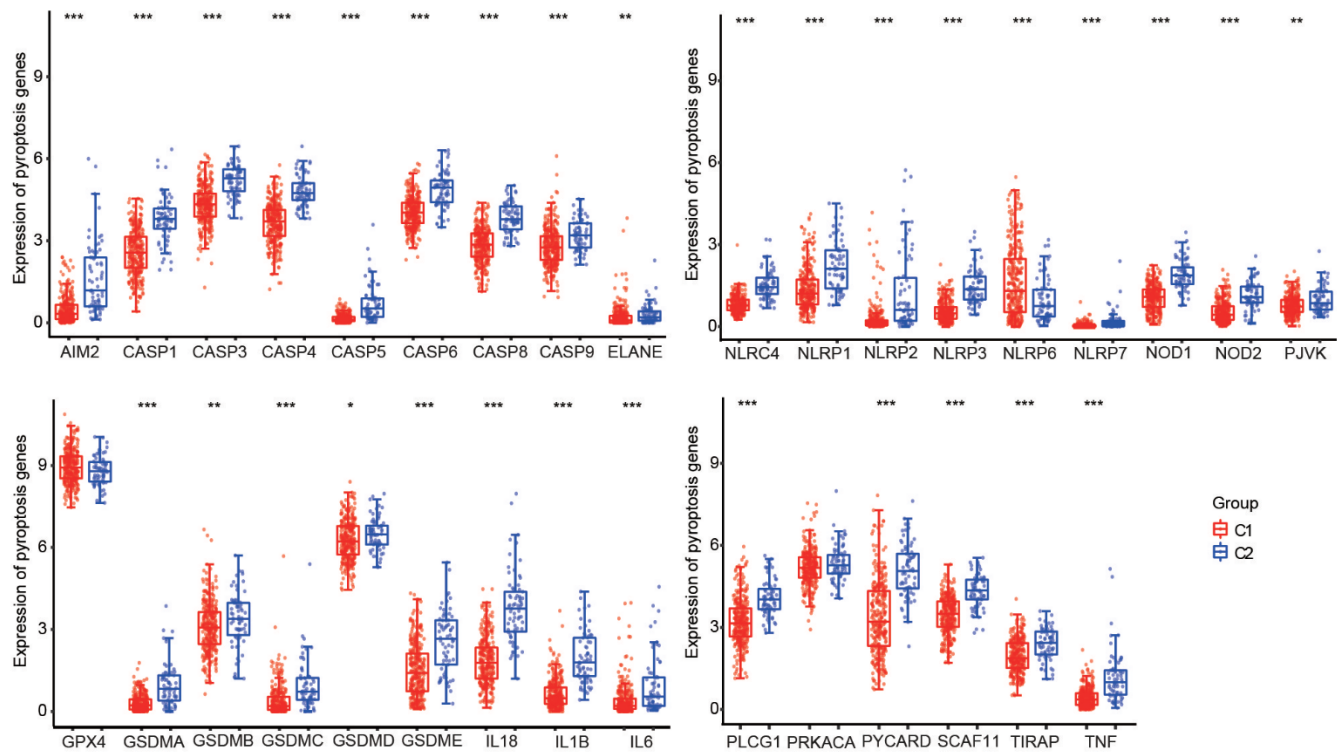

**Supplementary Figure 3. Differential expression of 33 PRGs in C1 and C2. \*p < 0.05, \*\*p < 0.01, \*\*\*p < 0.001.**

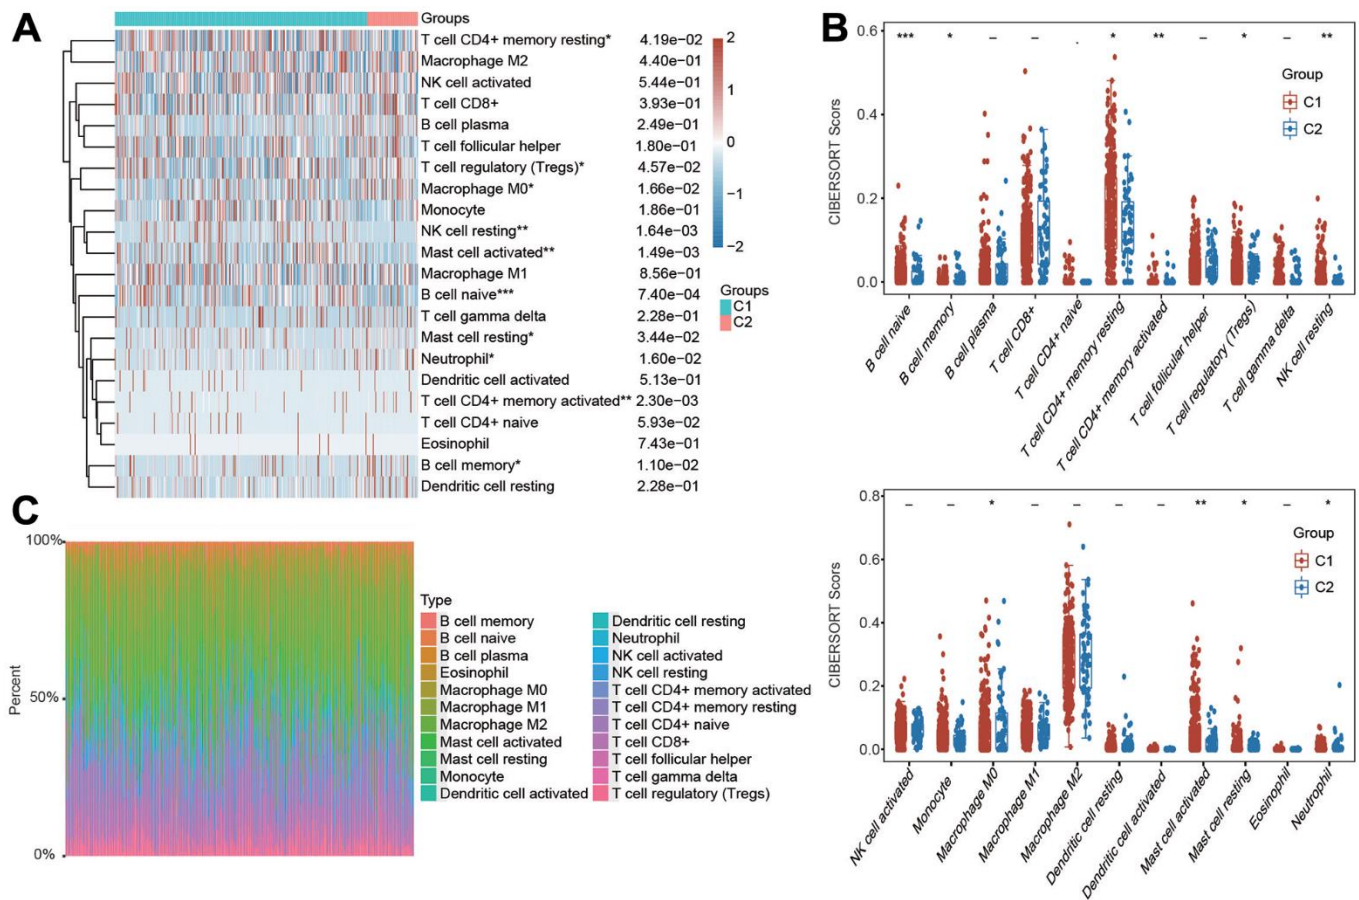

**Supplementary Figure 4. Evaluation of immune cell infiltration abundance in different clusters of HCC samples by the CIBERSORT algorithm.** (A, B) Heatmap and box diagram demonstrating the differential infiltration abundance of various immune cells in C1 and C2. (C) Bar plot demonstrating the composition of a great variety of immune cells in every HCC patient from the two clusters analyzed by the CIBERSORT algorithm. \* $p < 0.05$ , \*\* $p < 0.01$ , \*\*\* $p < 0.001$ .

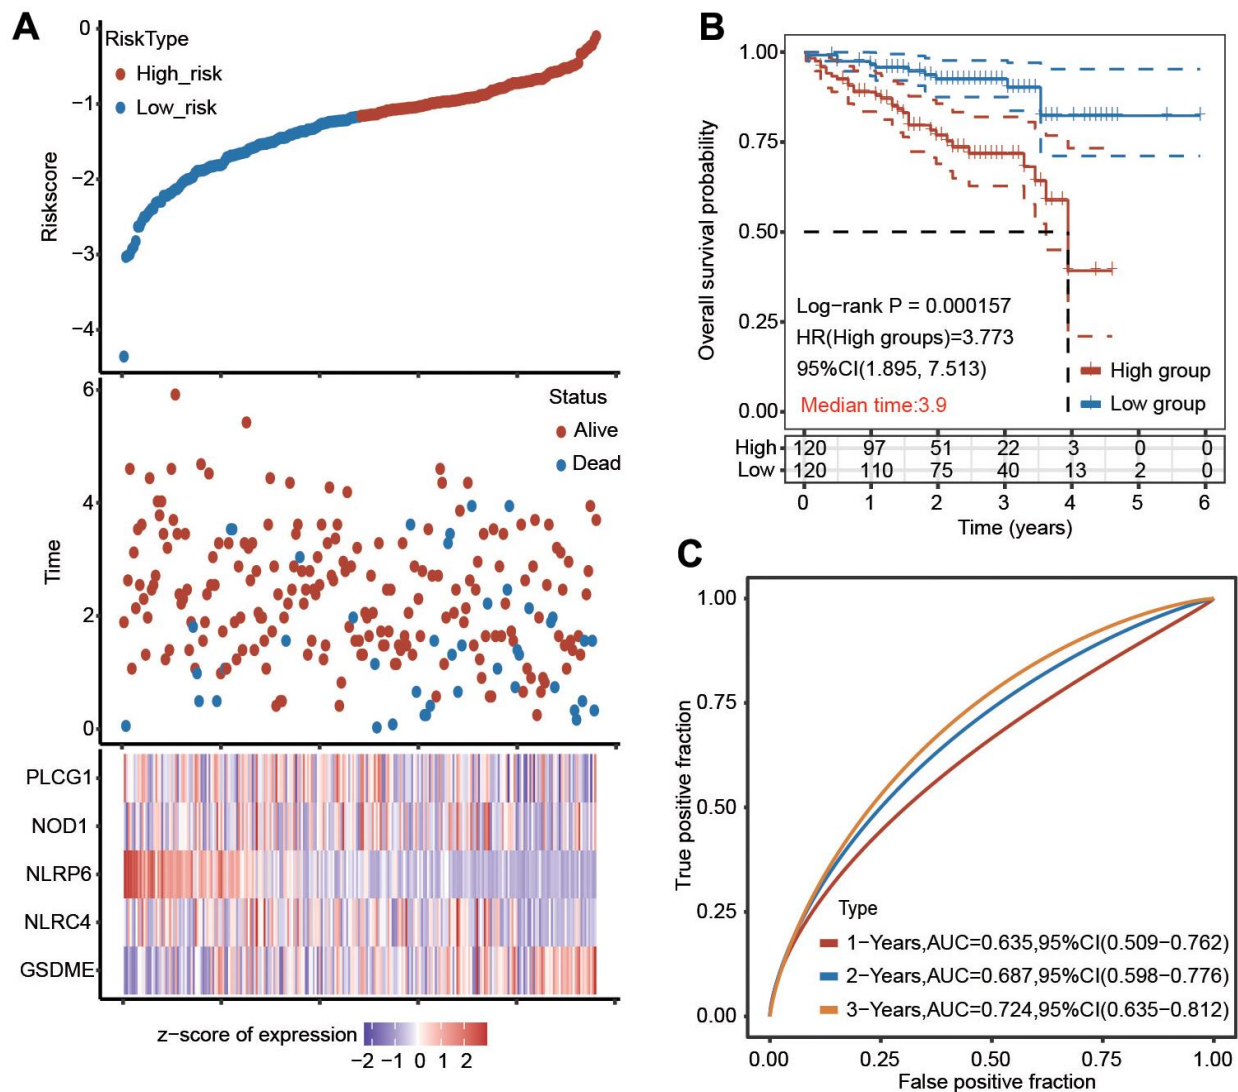

**Supplementary Figure 5. Validation of the five-PRG signature model with multivariate Cox regression analysis in the ICGC cohort. (A)** The risk score and OS status of each case. **(B)** KM analysis for the OS between two subgroups in the ICGC database. **(C)** The AUC of time-dependent ROC curves is shown.

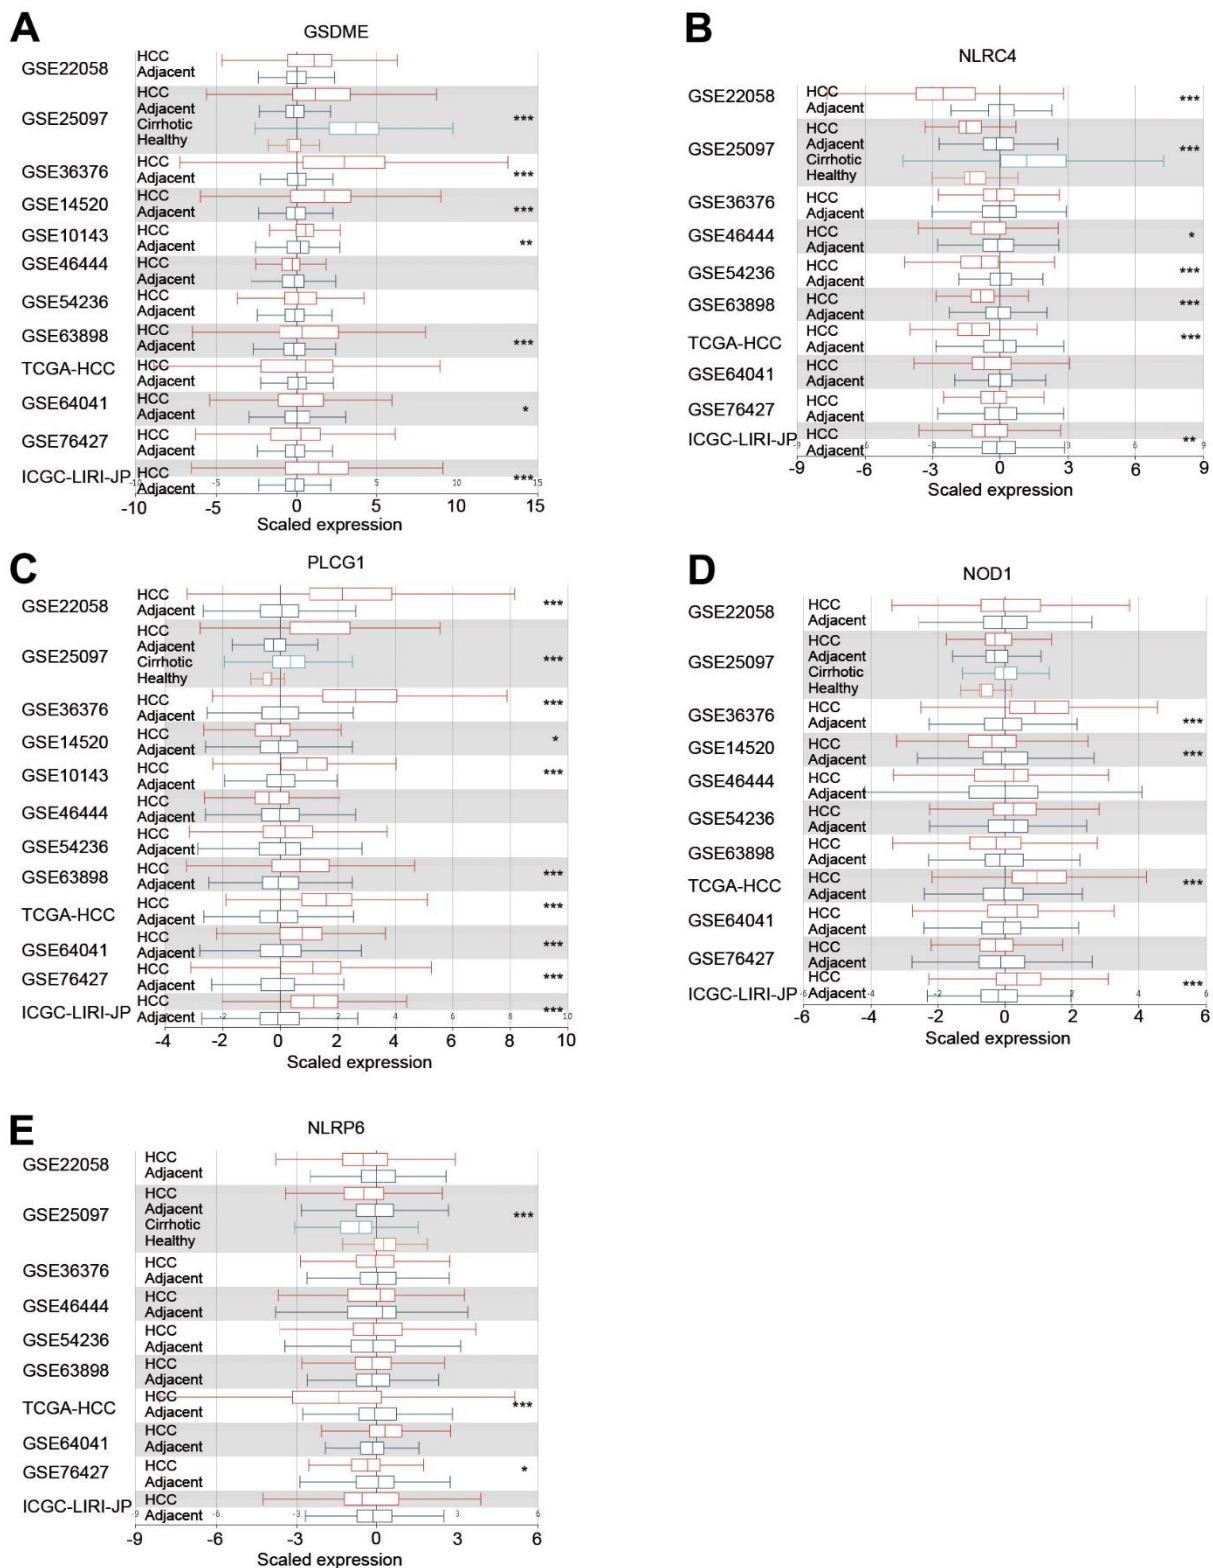

**Supplementary Figure 6. Expression of the PRGs.** (A–E) Expression of the 5 PRGs in HCC according to the HCCDB (Integrative Molecular Database of Hepatocellular Carcinoma) database. \* $p < 0.05$ , \*\* $p < 0.01$ , \*\*\* $p < 0.001$ .

**A**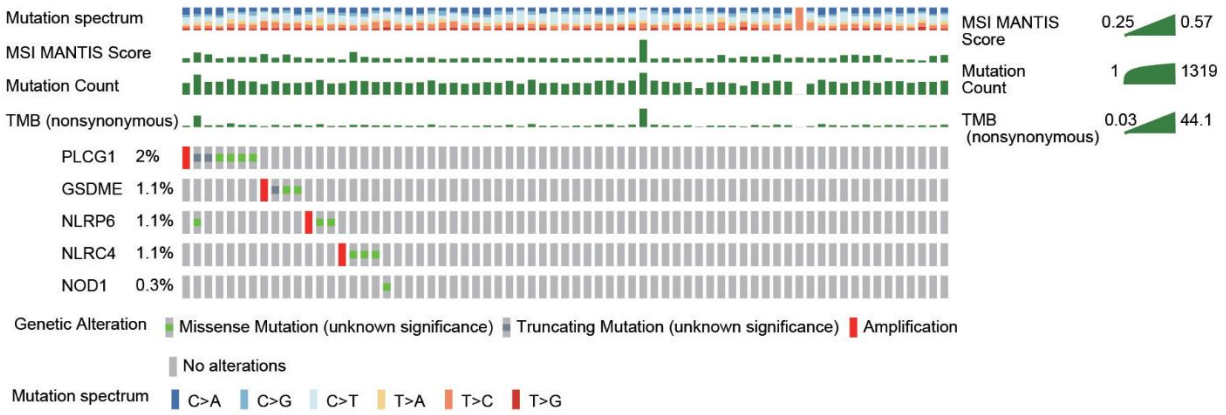**B**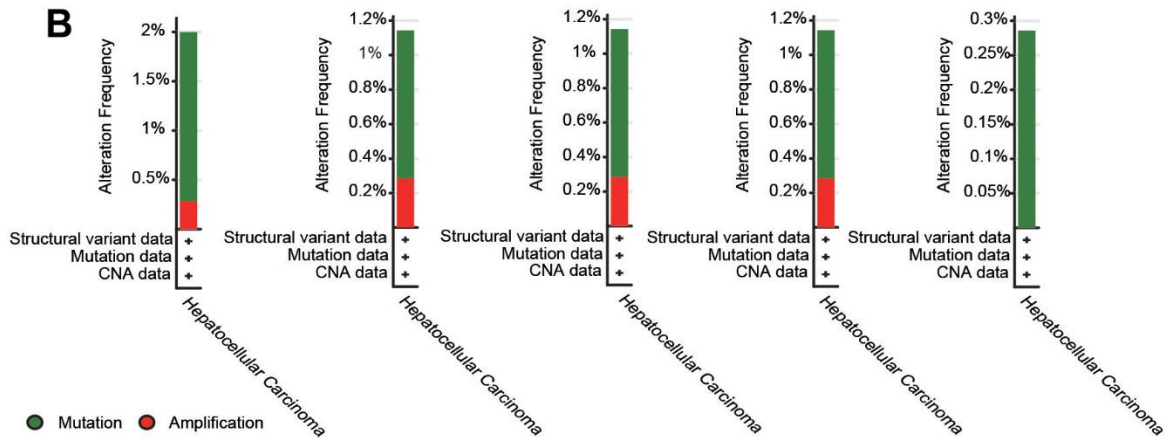**C**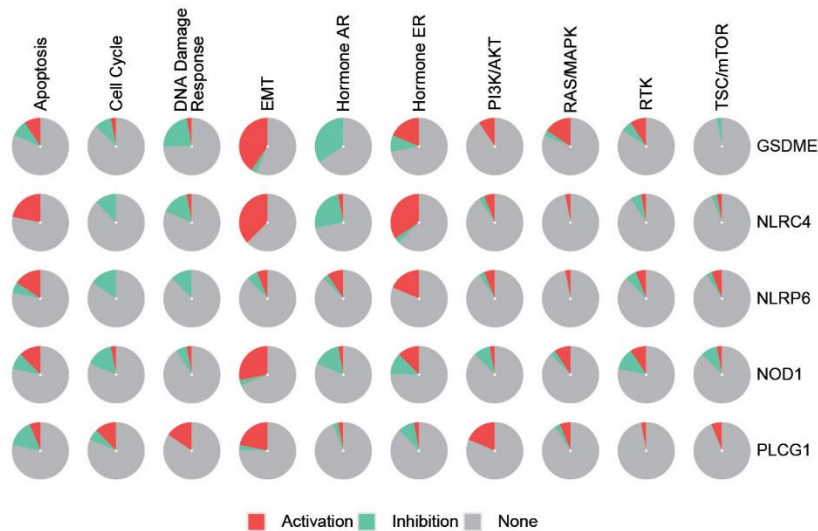

**Supplementary Figure 7. Landscape of the genetic alterations of the 5 PRGs and correlation with various signaling pathways.** (A, B) The genetic alterations of PLCG1, GSDME, NLRP6, NLR4 and NOD1 in HCC were explored using the cBioPortal online tool. (C) The relationship between 5 PRGs and multiple cancer-associated signaling pathways was investigated using the GSCALite database.
